# Supplementary material for: An integrated health delivery platform, targeting soil-transmitted helminths (STH) and canine mediated human rabies, results in cost savings and increased breadth of treatment for STH in remote communities in Tanzania
Source: BMC Public Health. 2019 Oct 28;19:1398. doi: 10.1186/s12889-019-7737-6 (PMC6819457; doi:10.1186/s12889-019-7737-6)
Supplement: Supplementary file 2 — Additional file 2. A list of target villages, the number of people of different age ranges that received deworming treatment and the number of dogs that were vaccinated against rabies. [file 12889_2019_7737_MOESM2_ESM.xlsx]

## Sheet: ALLVILLAGEDATA
	ARM	WARD	VILLAGE	SUBVILLAGE	SUBVILLCODE	BELOWFOUR	FIVETOSIX	SEVENTOTHIRTEEN	ABOVETHIRTEEN	TOTALWORMED	RABIES.DOSES
1	A	Soitsambu	KRITALO	Empopong'	KRI2	134	63	41	129	367	88
2	A	Soitsambu	KRITALO	Olosirwa	KRI3	77	63	20	66	226	33
3	A	Soitsambu	KRITALO	Karkimuru	KRI5	168	76	54	128	426	42
4	A	Soitsambu	KRITALO	Ilmisigiyo	KRI4	175	81	69	141	466	67
5	A	Soitsambu	KRITALO	Naidikidiko 1	KRI1	43	77	202	84	406	31
6	A	Maaloni	MAALONI	Lepolosi 1	MAA2	34	53	113	81	281	25
7	A	Maaloni	MAALONI	Ndung'orot	MAA4	58	25	12	49	144	25
8	A	Maaloni	MAALONI	Loshwash/Kipambi 1	MAA3	211	92	107	304	714	164
9	A	Maaloni	MAALONI	Sitet 1	MAA1	72	22	18	62	174	58
10	A	Maaloni	MAALONI	Endulelei 1	MAA5	51	14	26	41	132	48
11	A	Maaloni	NGOBERETI	Emarti	NGO1	252	70	100	204	626	83
12	A	Maaloni	NGOBERETI	Enabor Soit	NGO3	126	40	62	166	394	49
13	A	Maaloni	NGOBERETI	Ngobereti	NGO2	250	84	116	238	688	90
14	A	Olososokwan	NJOROI	Olekinuka	NJO2	136	31	35	118	320	80
15	A	Olososokwan	NJOROI	Oltepes 1	NJO4	76	36	50	67	229	67
16	A	Olososokwan	NJOROI	Olaika	NJO1	88	27	51	64	230	34
17	A	Olososokwan	NJOROI	Oiti 1	NJO3	76	61	163	90	390	32
18	A	Olorien / Magaiduru	OLDONYOWAS	Endakirowa	OLD3	91	44	37	150	322	57
19	A	Olorien / Magaiduru	OLDONYOWAS	Oldonyowas	OLD2	98	88	194	129	509	71
20	A	Olorien / Magaiduru	OLDONYOWAS	Loloiboni	OLD1	87	36	27	133	283	53
21	A	Olososokwan	OLOLOSOKWANI	Sero 1	OLOL2	221	57	42	146	466	62
22	A	Olososokwan	OLOLOSOKWANI	Ololosokwan 1	OLOL1	10	16	311	48	385	61
23	A	Arash	ORMANIE	Idupa 1	ORM3	117	28	20	82	247	91
24	A	Arash	ORMANIE	Ormanie 1	ORM1	127	81	20	86	314	58
25	A	Arash	ORMANIE	Oitti 1	ORM2	54	27	19	46	146	49
26	A	Orgosorok	SAKALA	Ndipilikwa	SAK2	18	3	3	56	80	55
27	A	Orgosorok	SAKALA	Lekondia	SAK3	26	30	72	45	173	38
28	A	Orgosorok	SAKALA	Kapongoni	SAK5	34	25	40	52	151	22
29	A	Orgosorok	SAKALA	Bwawani	SAK1	18	36	192	123	369	79
30	A	Orgosorok	SAKALA	Njoriet	SAK6	60	25	14	59	158	39
31	A	Orgosorok	SAKALA	Makalasinga	SAK4	21	9	6	41	77	33
32	B	Engeruserosambo	ENGUSEROSAMBU	Lopiriki	ENG2	130	56	66	79	331	NA
33	B	Engeruserosambo	ENGUSEROSAMBU	Olasae	ENG1	235	98	157	260	750	NA
34	B	Engeruserosambo	ENGUSEROSAMBU	Ndulele	ENG3	75	39	25	44	183	NA
35	B	Orgosorok	LOLIONDO	Loliondo Magharibi	LOL2	12	19	209	88	328	NA
36	B	Orgosorok	LOLIONDO	Loliondo Mashariki	LOL1	84	124	544	262	1014	NA
37	B	Olorien / Magaiduru	LOPOLUNI	Lopoluni B	LOP2	88	44	36	134	302	NA
38	B	Olorien / Magaiduru	LOPOLUNI	Lopoluni A	LOP1	98	32	342	100	572	NA
39	B	Olorien / Magaiduru	LOPOLUNI	Olobo	LOP4	98	26	42	61	227	NA
40	B	Olorien / Magaiduru	LOPOLUNI	Arkanda	LOP3	105	26	31	79	241	NA
41	B	Maaloni	LOSOITO	Mao	LOS02	84	18	8	61	171	NA
42	B	Maaloni	LOSOITO	Losoito 1	LOS01	71	35	125	98	329	NA
43	B	Maaloni	LOSOITO	Kuchinja	LOS03	37	22	15	30	104	NA
44	B	Olorien / Magaiduru	MAGAIDURU	Magaiduru	MAG1	57	12	58	58	185	NA
45	B	Olorien / Magaiduru	MAGAIDURU	Ndereyani	MAG2	56	27	154	113	350	NA
46	B	Arash	MBUKEN	Osukunwa	MBU2	95	19	42	85	241	NA
47	B	Arash	MBUKEN	Mbuken	MBU1	107	21	56	112	296	NA
48	B	Engeruserosambo	ORKIU JUU	Orkiu Juu	ORKB1	158	55	261	181	655	NA
49	B	Engeruserosambo	ORKIU JUU	Olosingo	ORKB3	81	29	33	78	221	NA
50	B	Engeruserosambo	ORKIU JUU	Orokoroi	ORKB2	97	61	24	95	277	NA
51	B	Engeruserosambo	ORKIU JUU	Ngototo	ORKB4	38	10	9	49	106	NA
52	B	Oloipiri	ORKUYENI	Ngutoto	ORKU2	80	22	38	76	216	NA
53	B	Oloipiri	ORKUYENI	Orkuyeni A	ORKU1	81	69	94	62	306	NA
54	C	Soitsambu	MONDOROSI	Olchoki 1	MON3	NA	NA	NA	NA	NA	58
55	C	Soitsambu	MONDOROSI	Enadoshoke	MON4	NA	NA	NA	NA	NA	55
56	C	Soitsambu	MONDOROSI	Lepolosi 2	MON1	NA	NA	NA	NA	NA	40
57	C	Soitsambu	MONDOROSI	Orkijiji	MON2	NA	NA	NA	NA	NA	46
58	C	Engeruserosambo	NAAN	Olchurai 1	NAA1	NA	NA	NA	NA	NA	70
59	C	Engeruserosambo	NAAN	Naan 1	NAA2	NA	NA	NA	NA	NA	32
60	C	Engeruserosambo	NAAN	Oloshoo	NAA3	NA	NA	NA	NA	NA	64
61	C	Engeruserosambo	NG'ARWA	Embulubuli	NGA2	NA	NA	NA	NA	NA	45
62	C	Engeruserosambo	NG'ARWA	Ng'arwa	NGA1	NA	NA	NA	NA	NA	94
63	C	Engeruserosambo	NG'ARWA	Oloimoronyai	NGA3	NA	NA	NA	NA	NA	88
64	C	Oloipiri	OLOIPIRI	Lajang'a	OLOI4	NA	NA	NA	NA	NA	75
65	C	Oloipiri	OLOIPIRI	Loswash	OLOI1	NA	NA	NA	NA	NA	59
66	C	Oloipiri	OLOIPIRI	Esero	OLOI3	NA	NA	NA	NA	NA	84
67	C	Oloipiri	OLOIPIRI	Oloipiri	OLOI2	NA	NA	NA	NA	NA	38
68	C	Olorien / Magaiduru	OLOIRIENI / LOINEN	Lemishiri	OLOR3	NA	NA	NA	NA	NA	31
69	C	Olorien / Magaiduru	OLOIRIENI / LOINEN	Lorien	OLOR1	NA	NA	NA	NA	NA	83
70	C	Olorien / Magaiduru	OLOIRIENI / LOINEN	Lukumay	OLOR2	NA	NA	NA	NA	NA	48
71	C	Orgosorok	ORKIU CHINI	Olturoto	ORK3	NA	NA	NA	NA	NA	29
72	C	Orgosorok	ORKIU CHINI	Kisamis	ORK1	NA	NA	NA	NA	NA	31
73	C	Orgosorok	ORKIU CHINI	Oletet	ORK2	NA	NA	NA	NA	NA	31
74	C	Soitsambu	SOITSAMBU	Esilalei	SOI1	NA	NA	NA	NA	NA	70
75	C	Soitsambu	SOITSAMBU	Soitsambu	SOI2	NA	NA	NA	NA	NA	76
76	C	Soitsambu	SOITSAMBU	Orkoroi	SOI3	NA	NA	NA	NA	NA	48
77	C	Oloipiri	SUKENYA	Embash 1	SUK4	NA	NA	NA	NA	NA	91
78	C	Oloipiri	SUKENYA	Sukenya Juu 1	SUK3	NA	NA	NA	NA	NA	73
79	C	Oloipiri	SUKENYA	Olokoboi 1	SUK2	NA	NA	NA	NA	NA	141
80	C	Oloipiri	SUKENYA	Orongai	SUK1	NA	NA	NA	NA	NA	69
Key:
BELOWFOUR	number of children below 5 years old that received de worming treatment in the subvillage
FIVETOSIX	number of children between 5 and 6 years old that received de worming treatment in the subvillage
SEVENTOTHIRTEEN	number of children between 7 and 13 years old that received de worming treatment in the subvillage
ABOVETHIRTEEN	number of people above 13 years old that received de worming treatment in the subvillage
TOTALWORMED	total number of people in the subvillage that received deworming treatment
RABIES.DOSES	number of dogs vaccinated in the subvillage
